# Supplementary material
Source: Oxford University Press journal article supplement (https://cob.silverchair-cdn.com/cob/content_public/journal/dev/issue/89/supplement/7/bm_develop-89-supplement.pdf)
Supplement: Supplementary file 1 [file bm_develop-89-supplement.pdf]

# JEEM

## Journal of Embryology and Experimental Morphology

|                                                                                                                                                                                          |         |
|------------------------------------------------------------------------------------------------------------------------------------------------------------------------------------------|---------|
| <b>Wylie, C. C., Brown, D., Godsave, S. F., Quarmby, J. and Heasman, J.</b><br>The cytoskeleton of <i>Xenopus</i> oocytes and its role in development                                    | 1-15    |
| <b>Hausen, P., Wang, H. Y., Dreyer, C. and Stick, R.</b> Distribution of nuclear proteins during maturation of the <i>Xenopus</i> oocyte                                                 | 17-34   |
| <b>Taylor, M. A., Robinson, K. R. and Smith, L. D.</b> Intracellular pH and ribosomal protein S6 phosphorylation: role in translational control in <i>Xenopus</i> oocytes                | 35-52   |
| <b>Malacinski, G. M. and Barone, D.</b> Towards understanding paternal extragenic contributions to early amphibian pattern specification: the axolotl <i>ts-1</i> gene as a model system | 53-68   |
| <b>Cooke, J.</b> The system specifying body position in the early development of <i>Xenopus</i> , and its response to early perturbations                                                | 69-87   |
| <b>Gimlich, R. L.</b> Cytoplasmic localization and chordamesoderm induction in the frog embryo                                                                                           | 89-111  |
| <b>Dawid, I. B., Haynes, S. R., Jamrich, M., Jonas, E., Miyatani, S., Sargent, T. D. and Winkles, J. A.</b> Gene expression in <i>Xenopus</i> embryogenesis                              | 113-124 |
| <b>Gurdon, J. B., Mohun, T. J., Brennan, S. and Cascio, S.</b> Actin genes in <i>Xenopus</i> and their developmental control                                                             | 125-136 |
| <b>Slack, J. M. W., Cleine, J. H. and Smith, J. C.</b> Regional specificity of glycoconjugates in <i>Xenopus</i> and axolotl embryos                                                     | 137-153 |
| <b>Jones, E. A.</b> Epidermal development in <i>Xenopus laevis</i> : the definition of a monoclonal antibody to an epidermal marker                                                      | 155-166 |
| <b>Duprat, A. M., Kan, P., Gualandris, L., Foulquier, F., Marty, J. and Weber, M.</b> Neural induction: embryonic determination elicits full expression of specific neuronal traits      | 167-183 |
| <b>Keller, R. E., Danilchik, M., Gimlich, R. L. and Shih, J.</b> The function and mechanism of convergent extension during gastrulation of <i>Xenopus laevis</i>                         | 185-209 |
| <b>Boucaut, J. C., Darribere, T., Li, S. D., Boulekbache, H., Yamada, K. M. and Thiery, J. P.</b> Evidence for the role of fibronectin in amphibian gastrulation                         | 211-227 |
| <b>Gordon, R.</b> A review of the theories of vertebrate neurulation and their relationship to the mechanics of neural tube birth defects                                                | 229-255 |
| <b>Satoh, N.</b> Recent advances in our understanding of the temporal control of early embryonic development in amphibians                                                               | 257-270 |
| <b>Ford, C. C.</b> Maturation promoting factor and cell cycle regulation                                                                                                                 | 271-284 |
| <b>Laskey, R. A.</b> Chromosome replication in early development of <i>Xenopus laevis</i>                                                                                                | 285-295 |
| <b>Heasman, J., Snape, A., Smith, J. C. and Wylie, C. C.</b> Single cell analysis of commitment in early embryogenesis                                                                   | 297-316 |
| <b>Smith, J. C., Dale, L. and Slack, J. M. W.</b> Cell lineage of labels and region-specific markers in the analysis of inductive interactions                                           | 317-331 |
| <b>Nieuwkoop, P. D.</b> Inductive interactions in early amphibian development and their general nature                                                                                   | 333-347 |
| <b>Grunz, H.</b> Information transfer during embryonic induction in amphibians                                                                                                           | 349-363 |
| <b>Warner, A. E.</b> The role of gap junctions in amphibian development                                                                                                                  | 365-380 |

Available Free to 1985 subscribers to  
Journal of Embryology and Experimental Morphology

ISBN: 0 9508709 8 6

ISSN: 0022-0752

The Company of Biologists Limited  
Department of Zoology, University of Cambridge, Downing Street,  
Cambridge CB2 3EJ

© The Company of Biologists Limited 1985
